# Supplementary material
Source: publisher figshare collection journal article supplement (https://acs.figshare.com/ndownloader/files/12925097)
Supplement: Supplementary file 1 [file 12925097]

## **Supporting information**

### **Electron-Selective Epitaxial/Amorphous Germanium Stack Contact for Organic-Crystalline Silicon Hybrid Solar Cells**

Bingbing Chen<sup>1</sup>, Jianhui Chen<sup>\*1</sup>, Kunpeng Ge<sup>1</sup>, Linlin Yang<sup>1</sup>, Yanjiao Shen<sup>1</sup>,  
Wanbing Lu<sup>1</sup>, Li Guan<sup>1</sup>, Lizhi Chu<sup>1</sup>, Qingxun Zhao<sup>1</sup>, Yinglong Wang<sup>1</sup>, Ying Xu<sup>1</sup>,  
Yaohua Mai<sup>\*2</sup>

1 Hebei Key Lab of Optic-electronic Information and Materials, College of Physics  
Science and Technology, Hebei University, Baoding 071002, China

2 Institute of New Energy Technology, College of Information Science and  
Technology, Jinan University, Guangzhou, 510632, China

<sup>\*1</sup>E-mail: [chenjianhui@hbu.edu.cn](mailto:chenjianhui@hbu.edu.cn) (Jianhui Chen); <sup>\*2</sup>E-mail: [yaohuamai@jnu.edu.cn](mailto:yaohuamai@jnu.edu.cn)  
(Y. Mai)

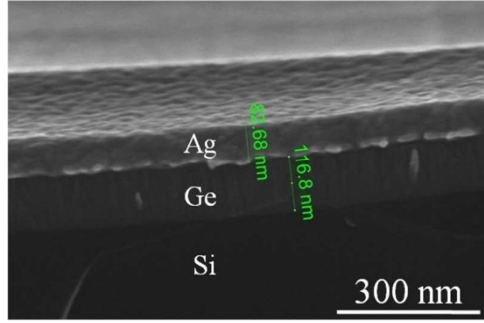

**Figure S1** Cross-sectional SEM image of the Si/Ge/Ag heterostructure.

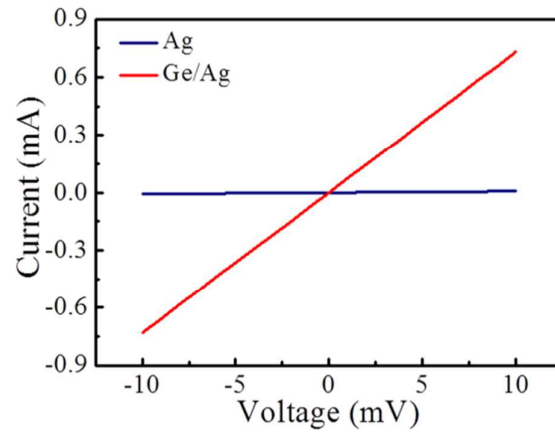

**Figure S2** Current-voltage measurements between Ag fingers with and without the Ge thin layer.

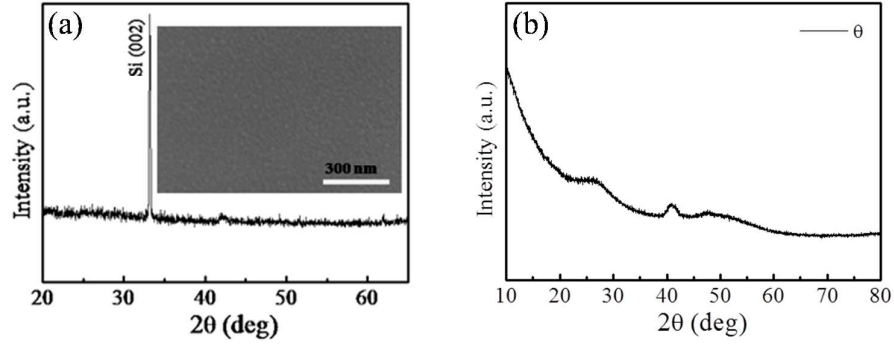

**Figure S3** Different methods of X-ray diffraction pattern for Ge thin film on Si substrate. (a) is the general method, and (b) is the result using a small angle ( $2^\circ$ ) X-ray scattering. The peak of Ge is not observed by both methods, implying that the Ge film is amorphous. The inset in (a) is top-view SEM image of the a-Ge thin film on Si substrate, which shows the uniform and compact distribution for grains.

Table S-1 Carrier density and mobility of materials.

|                      | Resistivity ( $\Omega \cdot \text{cm}$ ) | Carrier density ( $\text{cm}^{-3}$ )     | Mobility ( $\text{cm}^2 \cdot \text{V}^{-1} \cdot \text{s}^{-1}$ ) |           |
|----------------------|------------------------------------------|------------------------------------------|--------------------------------------------------------------------|-----------|
| <i>a-Ge</i> (120 nm) | 867                                      | $2.4 \times 10^{12}$                     | 2982                                                               | This work |
| <i>c-Ge</i>          | 50                                       | $2.4 \times 10^{13}$                     | 3900                                                               | Ref. [S1] |
| <i>n-Si</i>          | 0.1~10                                   | $1 \times 10^{15} \sim 1 \times 10^{18}$ | 1500                                                               | Ref. [S1] |
| <i>Ag</i>            | $1.65 \times 10^{-10}$                   | -                                        | -                                                                  | Ref. [S2] |

## Reference

- [S1] Sze S. M. *Physics of Semiconductor Devices*, 2nd ed; Wiley Publications: New York, 1981.
- [S2] Matula R. A. Electrical Resistivity of Copper, Gold, Palladium, and Silver. *J. Phys. Chem. Ref. Data.* **1979**, 8, 1147-1298.
